# Supplementary material for: Green-light-emitting carbon dots via eco-friendly route and their potential in ferric-ion detection and WLEDs
Source: Royal Society of Chemistry journal article supplement (doi:10.1039/d2ma00520d), 2022-01-01
Supplement: d2ma00520d1.pdf [file d2ma00520d1.pdf]

## Green light-emitting carbon dots via eco-friendly route and their potentials in ferric ion detection and WLEDs

Hanxun Qiu, Fangyu Yuan, Yuanchi Wang, Zheng Zhang, Jing Li, Ying Li\*

*School of Materials and Chemistry, University of Shanghai for Science and Technology, Shanghai 200093, China*

\*Corresponding Author: Ying Li

E-mail: [liyings@usst.edu.cn](mailto:liyings@usst.edu.cn) (Y Li)

Tel & Fax: +86-21-55270632

Conditional experiments were conducted to optimize the preparation of G-CDs. Results indicates that with the reaction temperature or time increasing, the QY varies slightly. The QY firstly is increased with the reaction temperature, then gradually decreases. Typically, the reaction performed at 190 for 8 hours yields G-CDs with the maximum QY of 48.8 which is comparative and even superior to the reported values.

**Table S1.** QY of G-CDs under various reaction conditions

| Sample | Temperature (°C) | Time (min) | QY (%) |
|--------|------------------|------------|--------|
| 1      | 160              | 8          | 30.2   |
| 2      | 170              | 8          | 37.6   |
| 3      | 180              | 8          | 43.2   |
| 4      | 190              | 8          | 48.8   |
| 5      | 200              | 8          | 46.5   |
| 6      | 210              | 8          | 47.5   |
| 7      | 220              | 8          | 45.3   |
| 8      | 190              | 4          | 35.2   |
| 9      | 190              | 6          | 42.2   |
| 10     | 190              | 10         | 48.5   |
| 11     | 190              | 15         | 46.2   |
| 12     | 190              | 30         | 48.2   |

**Table S2.** Luminous parameters of G-CDs-based WLEDs

| Current /mA | CCT /K | CIE coordinate | Ra   |
|-------------|--------|----------------|------|
| 20          | 4946   | 0.3448,0.3343  | 79.8 |
| 40          | 4706   | 0.3528,0.3475  | 74.8 |
| 60          | 4836   | 0.3475,0.3353  | 89.0 |
| 80          | 4987   | 0.3432,0.3273  | 82.6 |
| 100         | 4997   | 0.3437,0.3358  | 92.2 |
| 120         | 4939   | 0.3448,0.3326  | 90.3 |
